# Supplementary material for: Additive Manufacturing Sensor for Stress Biomarker Detection
Source: MDPI journal article supplement (doi:10.3390/chemosensors11050306), 2023-05-20
Supplement: s1 [file s1]

# Additive Manufacturing Sensor for Stress Biomarker Detection

Vinicius A. O. P. da Silva <sup>1</sup>, Jéssica S. Stefano <sup>1</sup>, Cristiane Kalinke <sup>2</sup>, Juliano A. Bonacin <sup>2</sup> and Bruno C. Janegitz <sup>1,\*</sup>

<sup>1</sup> Department of Nature Sciences, Mathematics and Education, Federal University of São Carlos, Araras 13600-970, São Paulo, Brazil; vinicius.silva@estudante.ufscar.br (V.A.O.P.d.S.); jessica.s.stefano@gmail.com (J.S.S.)

<sup>2</sup> Institute of Chemistry, University of Campinas, Campinas 13083-970, São Paulo, Brazil; ckalinke@unicamp.br (C.K.); jbonacin@unicamp.br (J.A.B.)

\* Correspondence: brunocj@ufscar.br; Tel.: +55-19-3543-7601

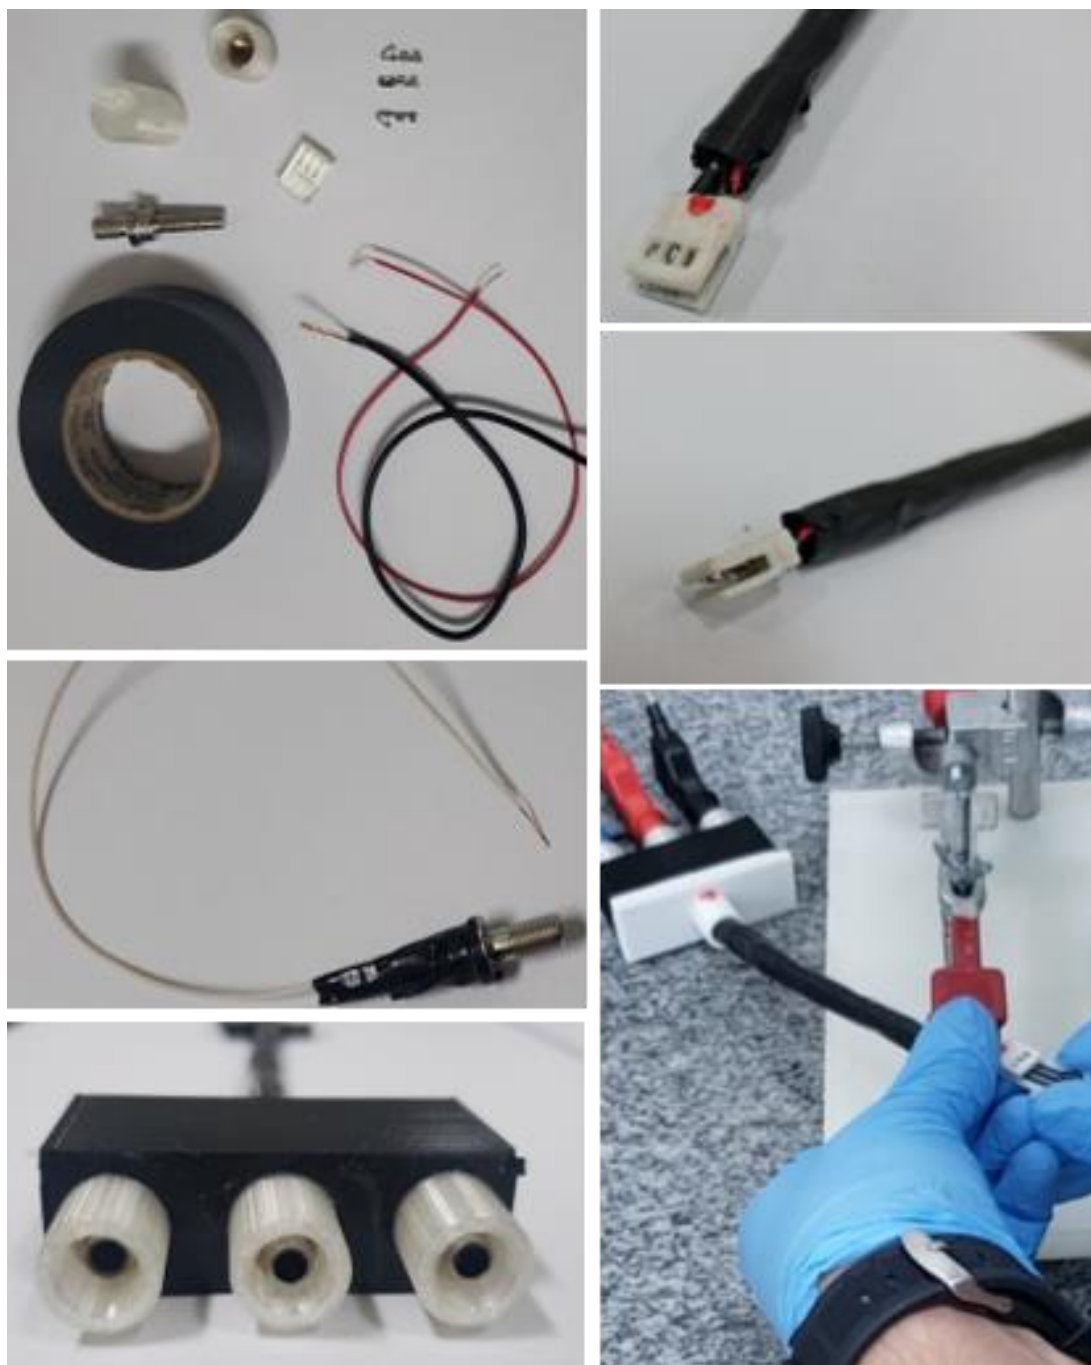

**Figure S1.** Assembling of the connector and support for the electrodes: (A-D) materials and the parts used for the connector fabrication; and (E-F) the ready-to-use connector.

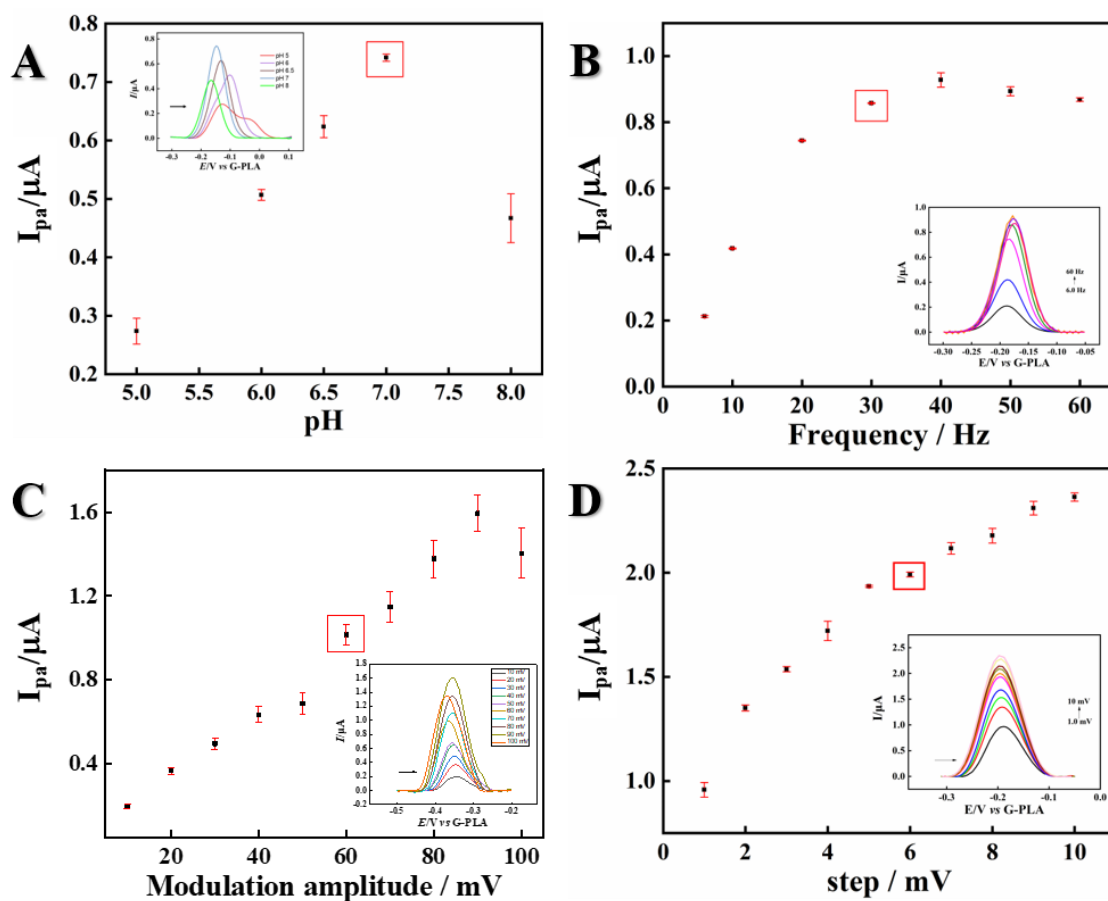

**Figure S2.** Evaluation of measurement and instrumental parameters for the determination of 0.1 mmol L<sup>-1</sup> epinephrine by SWV technique: (A) pH effect (5.0–8.0), (B) frequency (5.0–60 Hz), (C) modulation amplitude (5.0–8.0), and (D) step potential (n=3). SWV used parameters: (A) step = 5.0 mV, modulation amplitude = 20 mV, frequency = 6.0 Hz; (B) step = 5.0 mV, modulation amplitude = 20 mV; (C) step = 5.0 mV, Frequency 30 Hz; (D) Modulation amplitude = 60 mV, frequency = 30 Hz. (B-D) Supporting electrolyte: 0.1 mol L<sup>-1</sup> phosphate buffer (pH 7.0).

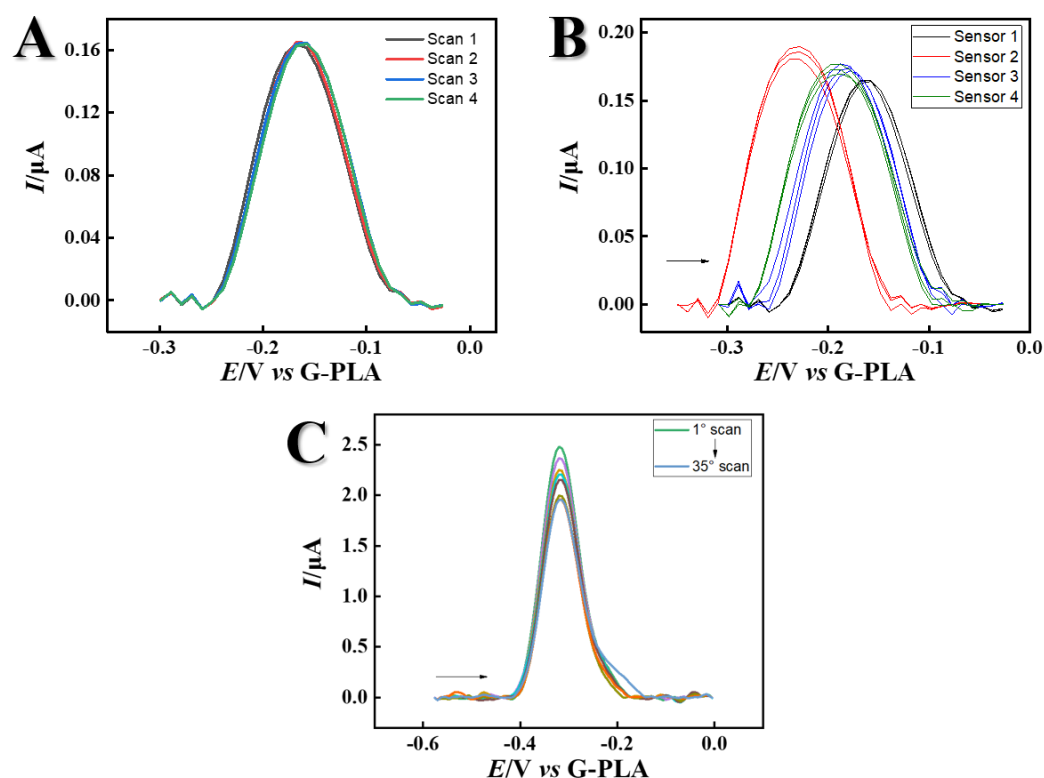

**Figure S3.** SWV voltammograms for the (A) repeatability study ( $n=4$ ), (B) inter-device study ( $n=4$ ) (C) stability study (over 35 scans, displayed every 5 scans), in the presence of  $10.0 \mu\text{mol L}^{-1}$  of epinephrine. Experimental conditions: step potential: 6 mV; modulation amplitude: 60 mV; frequency: 30 Hz. Supporting electrolyte:  $0.1 \text{ mol L}^{-1}$  phosphate buffer (pH 7.0).

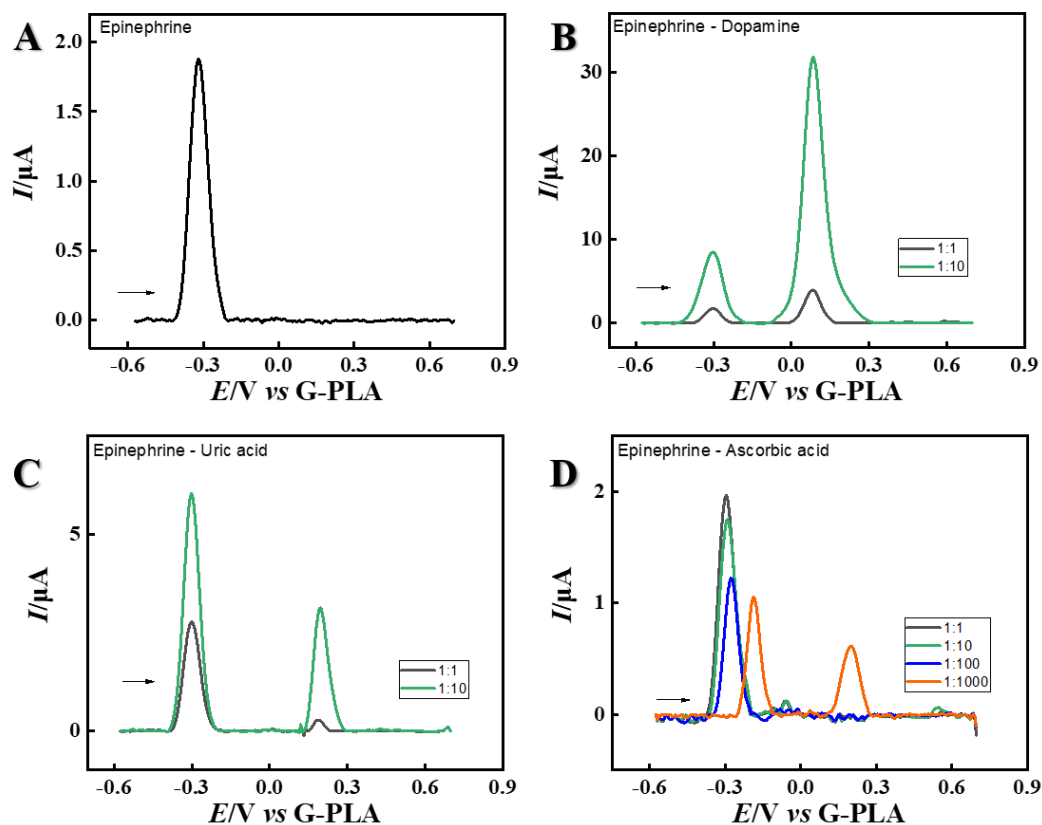

**Figure S4.** SWV voltammograms for the selectivity study, in the presence of (A)  $0.1 \text{ mmol L}^{-1}$  of epinephrine, (B)  $0.1 \text{ mmol L}^{-1}$  of epinephrine and Dopamine at two different ratios (1:1 and 1:10),

(C) 0.1 mmol L<sup>-1</sup> of epinephrine and uric acid at two different ratios (1:1 and 1:10), (D) 0.1 mmol L<sup>-1</sup> of epinephrine and uric ascorbic at four different ratios (1:1, 1:10, 1:100 and 1:1000). Experimental conditions: step potential: 6 mV; modulation amplitude: 60 mV; frequency: 30 Hz. Supporting electrolyte: 0.1 mol L<sup>-1</sup> phosphate buffer (pH 7.0).

**Table S1.** Selectivity study on the SWV signal of 0.1 mmol L<sup>-1</sup> epinephrine.

| Interferents  | Interfering ratio<br>(Epinephrine:interferent) | Currente signal variation<br>(%) |
|---------------|------------------------------------------------|----------------------------------|
| Dopamine      | 1:1                                            | -7.44                            |
|               | 1:10                                           | +351                             |
| Uric acid     | 1:1                                            | +48                              |
|               | 1:10                                           | +221                             |
| Ascorbic Acid | 1:1                                            | +4.25                            |
|               | 1:10                                           | -6.19                            |
|               | 1:100                                          | -34.5                            |
|               | 1:1000                                         | -43.6                            |
